# Supplementary material for: Inhibition of diacylglycerol O-acyltransferase 1 provides neuroprotection by inhibiting ferroptosis in ischemic stroke
Source: Springer Nature journal article supplement (doi:10.1186/s10020-025-01255-w), 2025-05-15
Supplement: MOESM1 [file 10020_2025_1255_MOESM1_ESM.pdf]

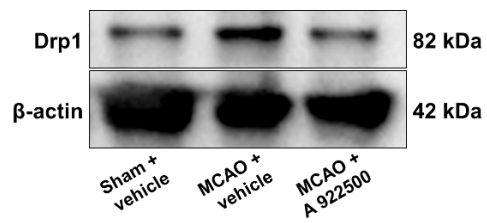

**Supplementary Fig.** Western blot analysis showing increased Drp1 levels in the MCAO group compared to the sham group, which were significantly reduced following treatment with the DGAT1 inhibitor A 922500.
